# Supplementary material
Source: HighWire-hosted journal article supplement (https://thorax.bmj.com/highwire/filestream/174176/field_highwire_adjunct_files/2/Supplementary_figure2.pdf)

Supplementary Figure 2

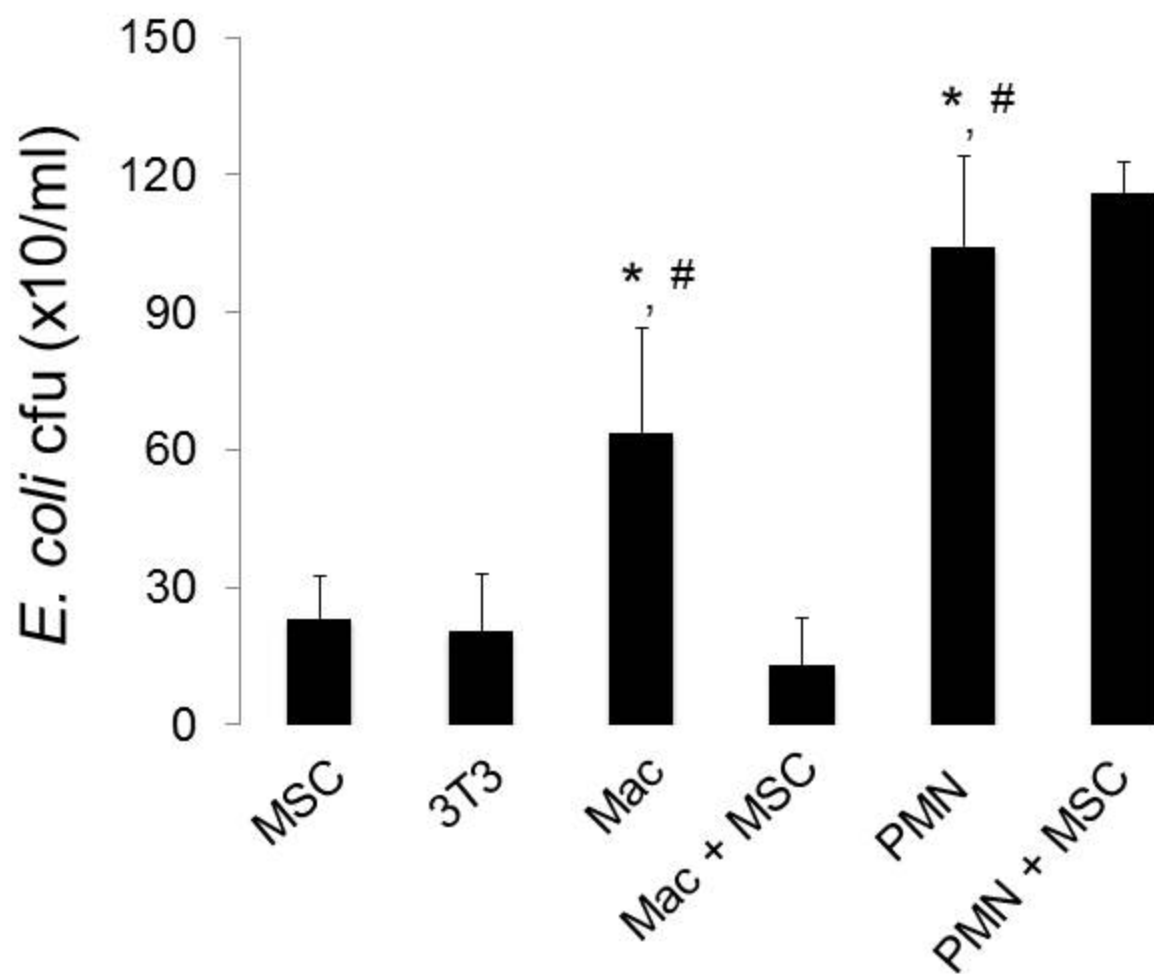

Supplement: Supplementary_figure2.pdf [file Supplementary_figure2.pdf]
